# Supplementary material for: Metabolic Profiling of Total Physical Activity and Sedentary Behavior in Community-Dwelling Men
Source: PLoS One. 2016 Oct 14;11(10):e0164877. doi: 10.1371/journal.pone.0164877 (PMC5065216; doi:10.1371/journal.pone.0164877)
Supplement: S4 Table — (XLSX) [file pone.0164877.s006.xlsx]

## Sheet: S4 Table
S4 Table. Summary of metabolite concentrations of the original and replication population
			Original population										Replication population
Polarity	Metabolite	Limit of detection (LOD) [μM]	N	Number of samples below LOD	Rate of samples below LOD [%]	Geometric Mean [μM]	Geometric Standard Deviation [μM]	Median [μM]	Minimun [μM]	Maximun [μM]	25th percentile [μM]	75th percentile [μM]	N	Number of samples below LOD	Rate of samples below LOD [%]	Geometric Mean [μM]	Geometric SD [μM]	Median [μM]	Minimun [μM]	Maximun [μM]	25th percentile [μM]	75th percentile [μM]
Cation	Urea	22.41	808	0	0	3443.21	1729.81	3537.34	877.25	13751.7	2608.47	4587.84	385	0	0	3406.5	1636.78	3491.92	978.81	19761.5	2621.73	4476.19
Cation	Glycine	0.4	808	0	0	198.8	52.81	195.63	93.68	492.02	169.12	232.38	385	0	0	198.49	51.65	190.93	105	425.98	169.73	231.52
Cation	Trimethylamine N-oxide	0.06	807	1	0.1	4.11	7.66	3.72	0.37	86.12	2.06	7.74	385	0	0	3.72	7.17	3.27	0.45	105.52	1.92	7.04
Cation	beta-Ala	0.2	808	0	0	3.01	1.1	3.01	0.96	9.62	2.39	3.8	385	0	0	3	1.03	3.02	1.4	7.07	2.39	3.72
Cation	Alanine	0.32	808	0	0	355.96	92.31	354.79	154.96	781.67	301.93	422.46	385	0	0	353.33	91.11	358.3	171.31	644.03	295.34	418.01
Cation	Sarcosine	0.31	795	13	1.6	3.43	1.47	3.35	1.02	9.95	2.61	4.48	375	10	1.2	3.4	1.41	3.42	0.98	12.5	2.58	4.38
Cation	3-Aminoisobutyrate	0.11	804	4	0.5	1.68	1.52	1.76	0.23	8	1.03	2.84	383	2	0.2	1.67	1.47	1.74	0.29	16.45	1.09	2.67
Cation	2-Aminobutyrate	0.16	808	0	0	20.61	6.89	20.47	6.1	61.16	16.93	25.07	385	0	0	20.43	7.64	20.24	7.66	68.75	16.41	25.34
Cation	N,N-Dimethylglycine	0.29	808	0	0	5.87	2.24	5.8	2.38	19.59	4.59	7.3	385	0	0	5.82	2.46	5.74	2.18	32.36	4.53	7.18
Cation	Choline	0.03	808	0	0	15.37	4.3	15.32	3.34	33.36	12.93	18.22	385	0	0	15.32	3.94	15.2	6.81	37.11	12.98	17.54
Cation	Serine	0.41	808	0	0	111.68	27.68	109.73	31.18	318.85	97.55	125.84	385	0	0	110.97	28.53	110.69	43.92	301.91	96.07	125.89
Cation	Creatinine	0.04	808	0	0	65.86	12.87	65.73	27.53	248.92	58.08	73.62	385	0	0	65.28	13.05	64.35	37.2	136.76	57.2	73.76
Cation	Proline	0.16	808	0	0	145.94	47.33	142.31	64.36	679.92	118.53	175.1	385	0	0	144.3	50.32	139.71	57	413.12	115.39	175.96
Cation	Guanidinoacetate	0.08	807	1	0.1	3.2	0.89	3.29	0.88	7.32	2.72	3.8	385	0	0	3.22	0.82	3.31	1.57	5.79	2.75	3.78
Cation	Valine	0.33	808	0	0	233.86	42.62	230.99	134.45	445.56	206.95	261.49	385	0	0	232.86	44.95	234.28	141.18	464.06	210	262.25
Cation	Betaine	0.64	808	0	0	63.29	20.7	61.61	26.86	183.67	52.01	74.73	385	0	0	63.34	20.94	62.3	24.28	195.6	53.51	75.11
Cation	Threonine	0.4	808	0	0	130.78	29.67	130.2	52.61	326.28	115.34	148.48	385	0	0	130.64	30.91	127.35	78.2	377.67	111.73	149.23
Cation	Taurine	1.51	808	0	0	72.92	15.21	72.54	38.02	162.19	64.25	82.23	385	0	0	72.46	14.63	71.72	46.28	165.67	62.92	82.49
Cation	Pipecolate	0.1	808	0	0	1.67	1.18	1.52	0.39	85.8	1.15	2.16	385	0	0	1.68	1.16	1.56	0.65	42.64	1.2	2.11
Cation	Hydroxyproline	0.14	808	0	0	9.05	3.05	8.81	3.53	35.03	7.35	10.93	385	0	0	8.94	3.09	8.77	3.9	27.78	7.28	10.54
Cation	Creatine	0.07	808	0	0	30.08	17.89	31.07	5.62	111.91	21.59	42.31	385	0	0	30.96	17.19	32.46	6.24	89.87	22.68	43.79
Cation	Isoleucine	0.11	808	0	0	59.64	13.41	59.05	31.03	115.4	50.93	68.94	385	0	0	59.76	14.12	58.78	31.09	110.16	50.99	70.65
Cation	Leucine	0.11	808	0	0	117.06	21.12	116.68	63.12	197.3	102.99	131.85	385	0	0	116.88	22.93	119.73	65.6	185.65	102.84	133.45
Cation	Asparagine	0.31	808	0	0	46.48	7.74	46.13	25.52	105.24	42.14	51.47	385	0	0	46.81	7.52	46.9	30.6	76.94	42.4	51.68
Cation	Ornithine	0.1	808	0	0	37.35	9.13	36.87	19.14	96.77	32.2	42.98	385	0	0	37.33	9.17	37.24	20.89	126.79	32.02	43.37
Cation	Aspartic Acid	0.23	806	2	0.2	4.89	2.93	4.46	1.72	36.2	3.48	6.66	384	1	0.1	4.79	2.84	4.33	1.65	28.64	3.34	6.77
Cation	1-Methylnicotinamide	0.06	752	56	6.9	0.55	0.25	0.56	0.12	3.58	0.44	0.71	357	28	3.5	0.54	0.24	0.56	0.13	3.73	0.42	0.69
Cation	Proline betaine	0.1	806	2	0.2	2.1	3.32	1.83	0.19	37.89	1.12	3.31	385	0	0	2.22	3.61	1.91	0.31	41.37	1.16	3.96
Cation	gamma-Butyrobetaine	0.03	808	0	0	1.57	0.48	1.6	0.19	3.75	1.32	1.89	385	0	0	1.56	0.46	1.59	0.71	3.38	1.33	1.87
Cation	Glutamine	0.22	808	0	0	670.05	100.75	677.91	279.43	1006.15	609.29	737.91	385	0	0	672.76	102.36	682.67	310.92	963.64	614.78	744.54
Cation	Lysine	0.09	808	0	0	198.79	43.03	201.77	74.72	338.02	174.46	229.77	385	0	0	198.84	41.02	201.68	87.55	380.25	175.26	226.54
Cation	Glutamic Acid	0.43	808	0	0	37.15	18.01	37.44	9.69	121.29	27.66	49.95	385	0	0	36.29	17.44	36.62	12.35	101.27	27.13	47.95
Cation	Methionine	0.09	808	0	0	17.76	11.13	20.12	2.33	48.48	14.97	24.4	385	0	0	18.07	12.23	20.4	2.41	67.95	15.63	25.34
Cation	Histidine	0.06	808	0	0	71.21	12.16	71.45	29.3	568.82	65.15	78.37	385	0	0	71.58	11.06	71.94	39.63	129.49	65.01	78.95
Cation	alpha-Aminoadipate	0.12	807	1	0.1	1.1	0.34	1.11	0.38	3.6	0.91	1.32	385	0	0	1.08	0.34	1.08	0.48	3.17	0.89	1.28
Cation	Carnitine	0.04	808	0	0	65.62	14.04	65.97	20.63	122.43	57.21	75.19	385	0	0	65.41	14.08	66.21	31.03	111.97	56.63	75.63
Cation	Phenylalanine	0.07	808	0	0	52.59	9.9	52.26	30.15	144.43	46.56	59.02	385	0	0	52.07	9.59	51.42	27.81	101.84	45.89	59.4
Cation	3-Methylhistidine	0.04	808	0	0	5.72	4.02	5.16	1.82	59.97	3.77	8.16	385	0	0	5.33	3.32	4.81	1.8	30.54	3.61	7.28
Cation	Arginine	0.05	808	0	0	84.79	16.89	84.94	40.55	142.3	74.08	96.95	385	0	0	85.04	16.82	84.77	42.16	151.55	75.29	96.71
Cation	Indole-3-acetate	0.29	786	22	2.7	4.53	4.33	5.26	0.66	38.7	2.81	7.18	373	12	1.5	4.44	4.41	4.93	0.55	21.67	2.75	7.49
Cation	Citrulline	0.08	808	0	0	31.68	10.31	31.61	12.41	146.47	25.53	39.01	385	0	0	31.55	10.05	31.5	15.08	106.28	25.96	38.85
Cation	Tyrosine	0.22	808	0	0	65.73	12.01	65.25	37.14	116.87	58.17	74.14	385	0	0	65.27	11.53	65.82	39.83	110.39	58.1	72.3
Cation	Symmetric dimethylarginine	0.06	777	31	3.8	0.63	0.15	0.63	0.28	1.52	0.54	0.73	369	16	2	0.62	0.16	0.63	0.24	1.58	0.53	0.73
Cation	Asymmetric dimethylarginine	0.06	798	10	1.2	0.57	0.13	0.58	0.28	1.09	0.49	0.67	377	8	1	0.57	0.14	0.57	0.25	1.09	0.49	0.67
Cation	o-Acetylcarnitine	0.04	777	31	3.8	0.95	1.07	0.95	0.09	19.8	0.59	1.58	372	13	1.6	0.97	1.21	0.97	0.13	15.53	0.59	1.54
Cation	Tryptophan	0.07	808	0	0	45.03	9.78	46.23	21.57	89.72	38.96	52.22	385	0	0	45.08	9.83	45.62	19.15	94.61	39.42	51.71
Cation	Kynurenine	0.13	799	9	1.1	1.62	0.4	1.61	0.79	3.29	1.39	1.89	381	4	0.5	1.6	0.41	1.59	0.69	3.04	1.37	1.89
Cation	Cysteine-glutathione disulfide	0.11	802	6	0.7	1.41	0.68	1.39	0.43	16.94	1.07	1.83	377	8	1	1.42	0.72	1.38	0.49	17.12	1.07	1.79
Cation	Cystine	0.08	808	0	0	57.87	10.99	57.75	27.14	103.36	51.37	65.44	385	0	0	57.56	11.44	58.04	30.88	103.43	51.68	65.35
Cation	Uridine	0.65	808	0	0	26.4	7.08	25.7	12.17	68.7	22.22	30.43	385	0	0	26.44	7.08	25.71	12.64	63.58	22.29	30.68
Cation	Glycerophosphorylcholine	0.45	807	1	0.1	5.76	2.22	5.79	1.84	18.96	4.55	7.17	385	0	0	5.91	2.08	5.94	2.2	15.18	4.92	7.41
Anion	Pyruvate	3.37	794	14	1.7	68.96	25.38	68.83	20.96	207.08	55.86	85.75	376	9	1.1	68.14	25.55	70.27	19.7	166.97	56.45	84.96
Anion	Lactate	0.96	808	0	0	809.27	273.39	804.11	369.38	2315.43	647.75	987.62	385	0	0	806.24	286.95	801.58	401.45	3330.97	658.4	1003.25
Anion	2-Hydroxybutyrate	0.42	808	0	0	37.49	17.02	37.39	10.13	160.38	29.09	48.7	385	0	0	37.84	18.85	36.83	9.65	176.59	29.01	49.71
Anion	3-Hydroxybutyrate	0.65	808	0	0	77.07	85.84	68.81	16.02	882.14	44.52	121.96	385	0	0	76.07	87.99	67.8	17.56	2295.76	43.81	117.53
Anion	2-Oxoisopentanoate	0.44	805	3	0.4	14.8	3.67	14.9	7.13	28.39	12.59	17.36	385	0	0	14.6	3.62	14.53	5.98	29.42	12.6	16.97
Anion	Hexanoate	0.29	783	25	3.1	5.02	1.72	5.1	1.48	12.48	4.1	6.17	369	16	2	4.99	1.68	5.03	2.16	10.75	3.96	6.24
Anion	Succinate	0.14	808	0	0	9.41	2.86	9.29	3.36	42.85	7.89	10.92	385	0	0	9.57	2.73	9.7	3.59	26.76	8.14	11.18
Anion	2-Hydroxypentanoate	0.15	782	26	3.2	6.86	3.69	7.17	1.65	123.11	5.28	9.39	372	13	1.6	6.9	3.64	7.11	1.98	17.61	5.2	9.6
Anion	Isethionate	0.21	798	10	1.2	2.46	0.71	2.46	1.1	10.12	2.06	2.94	381	4	0.5	2.45	0.7	2.4	1.16	7.93	2.04	2.92
Anion	5-Oxoproline	0.27	808	0	0	28.06	8.98	26.76	13.59	355.46	23.52	31.82	385	0	0	27.55	7.58	26.73	14.69	85.88	23.6	30.5
Anion	4-Methyl-2-oxopentanoate	0.18	808	0	0	58.29	14.37	58.36	25.76	122.72	49.9	68.2	385	0	0	58.03	14.37	58.11	23.39	102.29	49.95	68.7
Anion	Glutarate	0.19	803	5	0.6	4.65	1.94	4.56	0.94	34.69	3.66	5.8	381	4	0.5	4.67	2	4.75	1.67	16.44	3.59	6
Anion	Malate	0.08	808	0	0	6.26	2.08	6.14	2.32	17.12	5.12	7.57	385	0	0	6.38	2.42	6.25	1.93	24.66	4.98	7.8
Anion	Threonate	0.16	808	0	0	26.01	9.07	26.56	7.87	126.54	21.92	31.55	385	0	0	25.91	9.01	26.38	8.74	132.58	21.92	30.95
Anion	Octanoate	0.22	748	60	7.4	2.72	0.76	2.67	1.18	5.8	2.28	3.22	355	30	3.7	2.71	0.76	2.67	1.27	5.93	2.23	3.2
Anion	2-Oxoglutarate	0.64	804	4	0.5	14.58	4.48	14.7	5.01	40.82	12.23	17.67	385	0	0	14.92	4.51	14.96	6.54	35.19	12.5	17.69
Anion	Pelargonate	0.29	798	10	1.2	3.03	1.7	2.87	0.94	21.69	2.18	4.03	381	4	0.5	3.07	1.7	2.91	1.12	18.62	2.27	3.93
Anion	Terephthalate	0.1	743	65	8	0.75	0.33	0.75	0.21	3.12	0.61	0.96	362	23	2.8	0.76	0.32	0.76	0.21	2.37	0.61	0.98
Anion	Urate	0.34	808	0	0	778.84	1699.59	579.05	152.17	9770.7	332.11	1787.89	385	0	0	768.15	1668.14	632.04	107.52	8164.25	322.63	1687.7
Anion	cis-Aconitate	0.05	808	0	0	4.77	1.5	4.84	1.1	12.62	4.03	5.78	385	0	0	4.75	1.66	4.83	1.57	12.78	4	5.85
Anion	N-Acetylaspartate	0.06	788	20	2.5	0.78	0.26	0.79	0.18	7.15	0.65	0.94	373	12	1.5	0.77	0.26	0.75	0.3	2.12	0.64	0.96
Anion	Azelate	0.08	781	27	3.3	0.68	0.41	0.65	0.16	5.29	0.5	0.87	374	11	1.4	0.69	0.44	0.65	0.16	4.13	0.49	0.95
Anion	Isocitrate	0.17	780	28	3.5	4.34	1.95	4.44	0.68	18.69	3.45	5.61	374	11	1.4	4.24	2.4	4.37	0.87	14.31	3.37	5.8
Anion	Citrate	0.06	808	0	0	109.75	48.44	104.88	38.4	420.26	84.33	136.86	385	0	0	108.35	49.17	105.24	26.15	351.56	85	134.8
Anion	Mucate	0.09	807	1	0.1	6.82	3.3	7.27	0.79	23.33	5.73	8.88	383	2	0.2	6.8	3.29	7.17	1.1	21.41	5.59	9.02
Anion	3-Indoxyl sulfate	0.14	776	32	4	4.07	2.97	4.17	0.81	41.37	2.83	5.94	364	21	2.6	4.2	3.13	4.3	0.66	17.7	2.84	6.17
